# Supplementary material
Source: publisher figshare collection journal article supplement (https://acs.figshare.com/ndownloader/files/4106626)
Supplement: Supplementary file 1 [file 4106626]

Supporting information:

One substrate, five products: Reactions catalyzed by the Dihydroneopterin Aldolase from *Mycobacterium tuberculosis*

Clarissa M. Czekster, John S. Blanchard\*

|                                                                                            |     |
|--------------------------------------------------------------------------------------------|-----|
| Figure S1: DHNA analysis by LC-ESI-MS.....                                                 | S2  |
| Figure S2: Sedimentation equilibrium ultracentrifugation.....                              | S3  |
| Figure S3: Comparison between DHNP and DHMP as substrates.....                             | S5  |
| Figure S4: Reverse reaction by NMR-based assays.....                                       | S6  |
| Figure S5: DHXP Equilibrium binding.....                                                   | S7  |
| Figure S6: Coupled assay with formate dehydrogenase.....                                   | S8  |
| Figure S7: HPLC assay with HP as substrate.....                                            | S9  |
| Figure S8: Relative position of C2'-OH from MP and NP.....                                 | S10 |
| Figure S9: Reverse reaction single turnover.....                                           | S11 |
| Figure S10: HPLC assays under STO conditions in H <sub>2</sub> O and D <sub>2</sub> O..... | S12 |
| Table S1: Rates measured.....                                                              | S13 |
| Table S2: Models tested for dome-shaped proton inventory fit.....                          | S14 |

Figure S1: DHNA analysis by LC-ESI-MS

Samples of DHNA were diluted with 2% acetonitrile/0.1% TFA to obtain a final concentration of 1  $\mu$ M. The injector with a 50  $\mu$ l loop of a Hewlett-Packard HP1100 HPLC was connected to a C-18 PepMap  $\mu$ -Pre-column trap (C18 PepMap, 100 A, 1mm x 15 mm, Dionex) which was directly connected to a Rheodyne Divert/Inject valve on the Thermo Electron Finnigan LTQ mass spectrometer. For each analysis, 10 pmol (10  $\mu$ l) of the sample or blank was injected. The following gradient for solvent A (5% acetonitrile/0.1% formic acid) and solvent B (95% acetonitrile/0.1% formic acid) at a flow rate of 100  $\mu$ l/min was used: 0-5 min, 2% B; 5-7 min, 50% B; 7-12 min, 90%B; 12-17 min, 2%B. LC-ESI-MS data were acquired from 5 to 12 min. Blank samples were injected in between sample injections. The electrospray voltage used was 4kV. Ten pmol (10  $\mu$ l) of 1  $\mu$ M Myoglobin standard (16,951.5 Da) was used as a reference or control to compare the accuracy of the molecular weights of the samples injected. The protein molecular weights were deconvoluted using MagTran and ProMass.

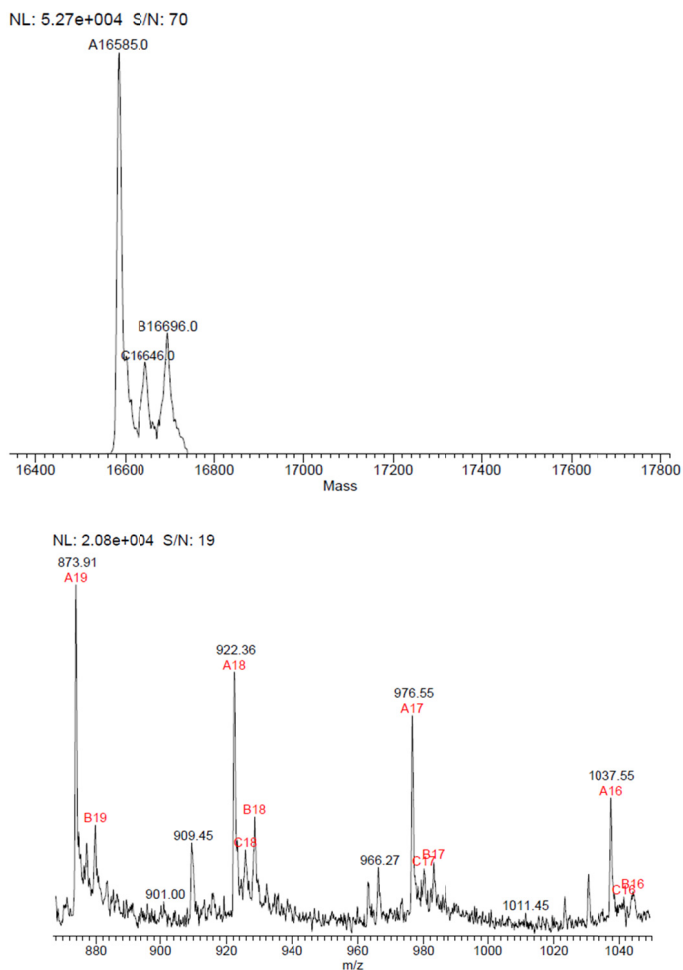

Figure S2: Sedimentation equilibrium ultracentrifugation

A – free DHNA, 25 $\mu$ M. Fit  
gives MW =  $62,299 \pm$   
25,715 Da.

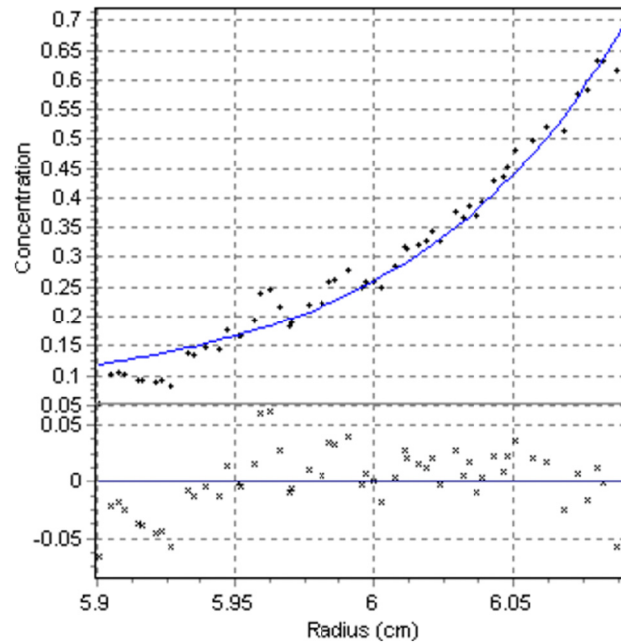

B - 25 $\mu$ M DHNA + 25 $\mu$ M  
NP (DHNP analog)  
Fit gives MW =  
 $117,853 \pm 9,774$  Da

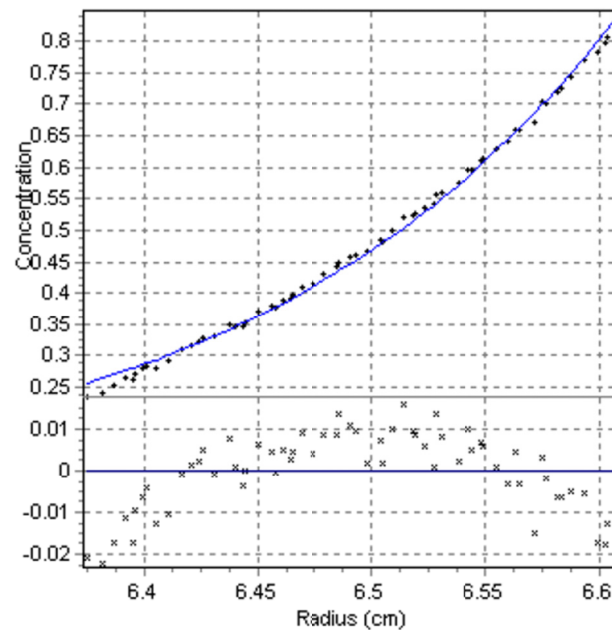

C - 25 $\mu$ M DHNA + 25 $\mu$ M  
DHXP  
Fit gives MW = 127,525  $\pm$   
4,105 Da

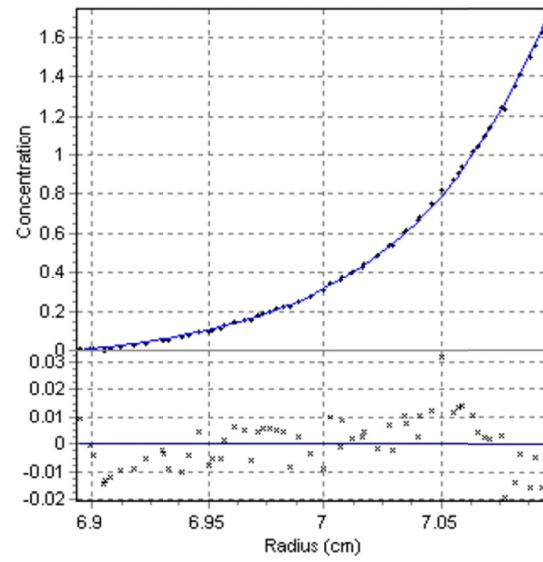

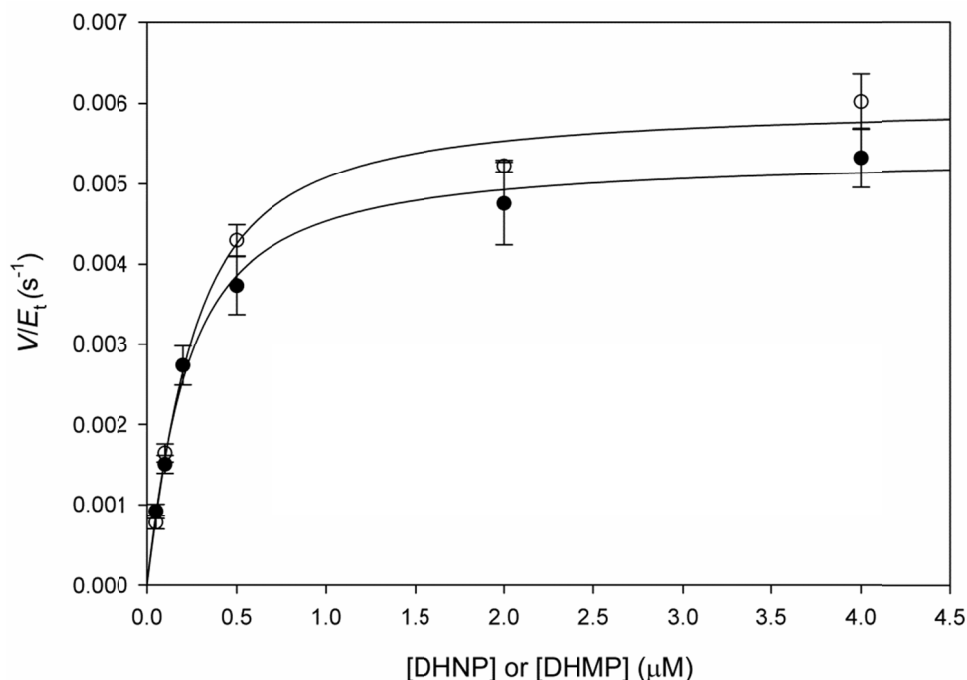

Figure S3: Comparison between DHNP and DHMP as substrates. Fluorescence-based assay comparing DHNP and DHMP as substrates. HP formation was monitored with an excitation wavelength of 430 nm, followed by an increase in fluorescence emission at 535 nm due to HP formation. The slits were 2 nm and 10 nm for excitation and emission, respectively. Reaction with 100 nM *Mt*DHNA, and varying concentrations of DHNP (●) or DHMP (○) in 100 mM HEPES pH 7.0 with 50 mM NaCl, 1mM EDTA, 5 mM DTT, 1% BSA. Temperature was equilibrated for 2 minutes, and reactions were monitored for 3-5 minutes. The first 30 seconds of the reaction with DHNP were excluded since there was a lag period. Data were fitted to eq. S1, giving  $K_{\text{DHNP}} = 165 \pm$

26 nM,  $K_{\text{DHMP}} = 154 \pm 27$  nM,  $k_{\text{cat-DHNP}} = 0.0060 \pm 0.0001 \text{ s}^{-1}$ ,  $k_{\text{cat-DHMP}} = 0.0070 \pm 0.0001$

S

$$v = V_{\text{max}} \cdot \frac{(E_0 + S_T + K_m) - \sqrt{(E_0 + S_T + K_m)^2 - 4 \cdot E_0 \cdot S_T}}{2 \cdot E_0} \quad (\text{S1})$$

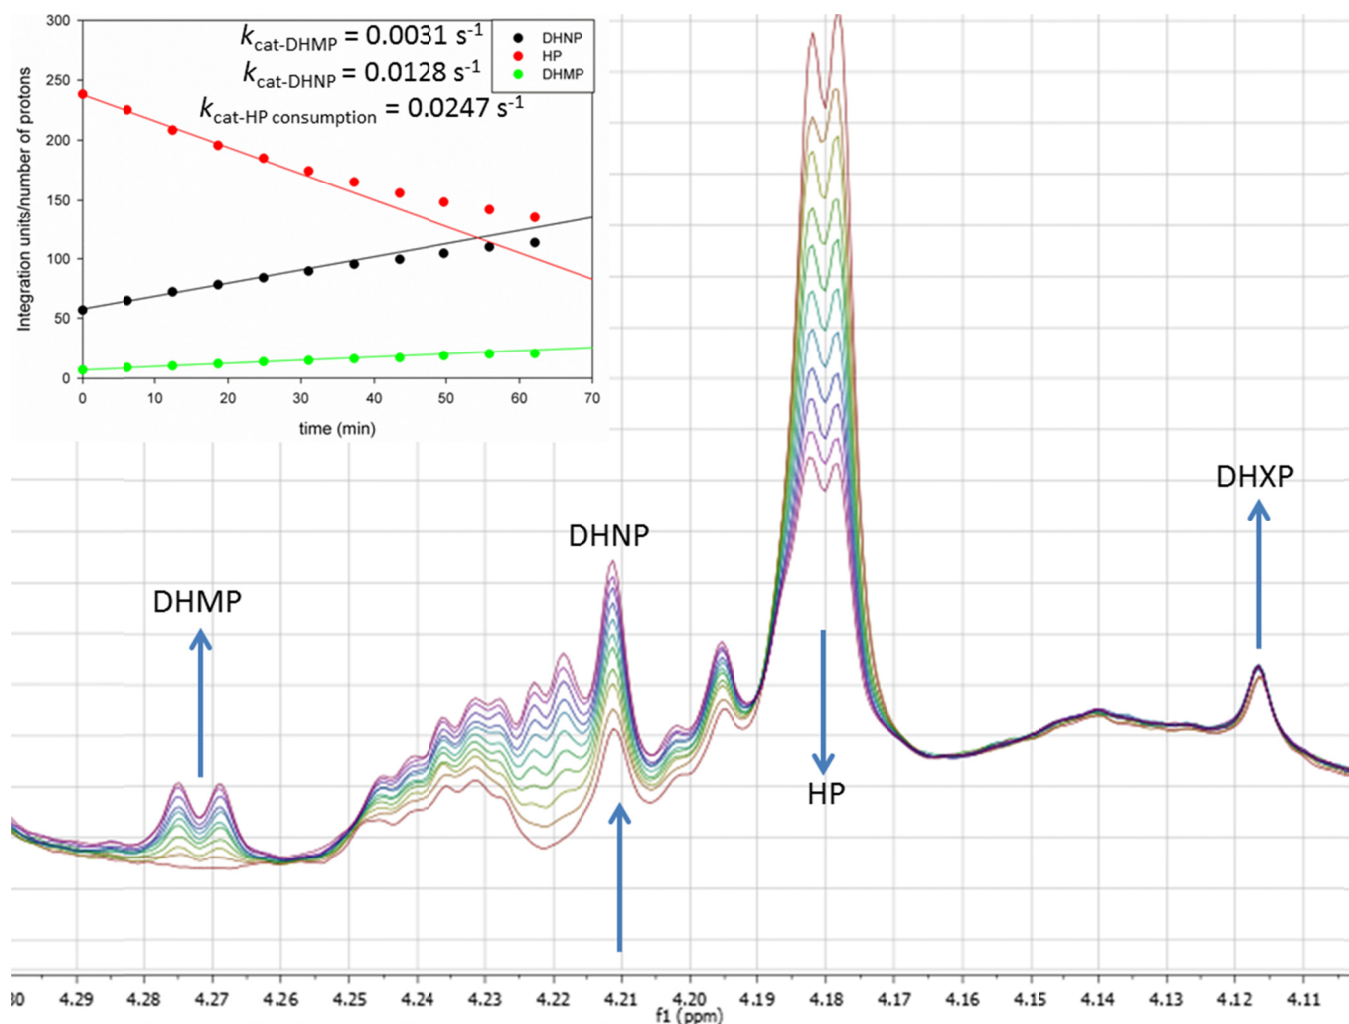

Figure S4: Reverse reaction by NMR-based assays. Reaction with 1mM HP, 50 mM GA, 3  $\mu\text{M}$  in 100 mM Phosphate pH 7.0 with 50 mM NaCl, 1mM EDTA, 5 mM DTT, 1% BSA. Reactions were monitored at room temperature, each trace is the average of 64 scans, taken every 6 minutes. Data for rate of formation of DHXP could not be fitted due to background issues.

Figure S5: DHXP Equilibrium binding

Figure S4: Continuous line: fit to a one site quadratic equation (eq. S2).  $K_{d1} = 0.17 \pm 0.15$ ; dashed line: fit to a two site binding hyperbolic equation.

$$K_{d1} = 0.01 \pm 0.01$$

$$K_{d2} = 0.98 \pm 0.24$$

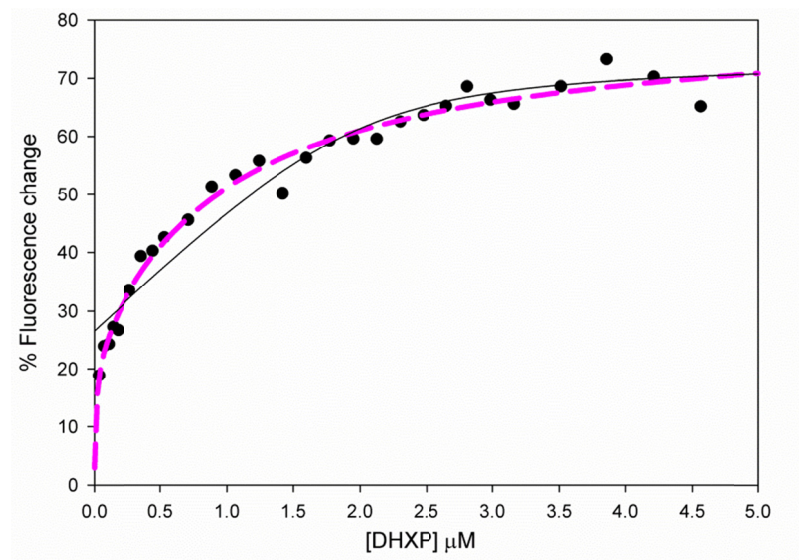

$$F = \frac{(E_0 + S_T + K_d) - \sqrt{(E_0 + S_T + K_d)^2 - 4 \cdot E_0 \cdot S_T}}{2 \cdot E_0} \quad \text{S2}$$

eq.

Figure S6: Coupled assay with formate dehydrogenase. In this assay, 100  $\mu\text{M}$  HP was used as substrate for *MtDHNA*, and 10  $\mu\text{M}$  formate dehydrogenase from *Candida boidinii* with 1 mM  $\text{NAD}^+$  were added to the reaction mixture. The total amount of NADH formed was calculated based on the total change in absorbance at 340 nm using  $\epsilon_{340} = 6,220 \text{ M}^{-1} \text{ cm}^{-1}$ . The curve in black was collected before adding *MtDHNA*, the curve in red is after the addition of 10  $\mu\text{M}$  *MtDHNA*.

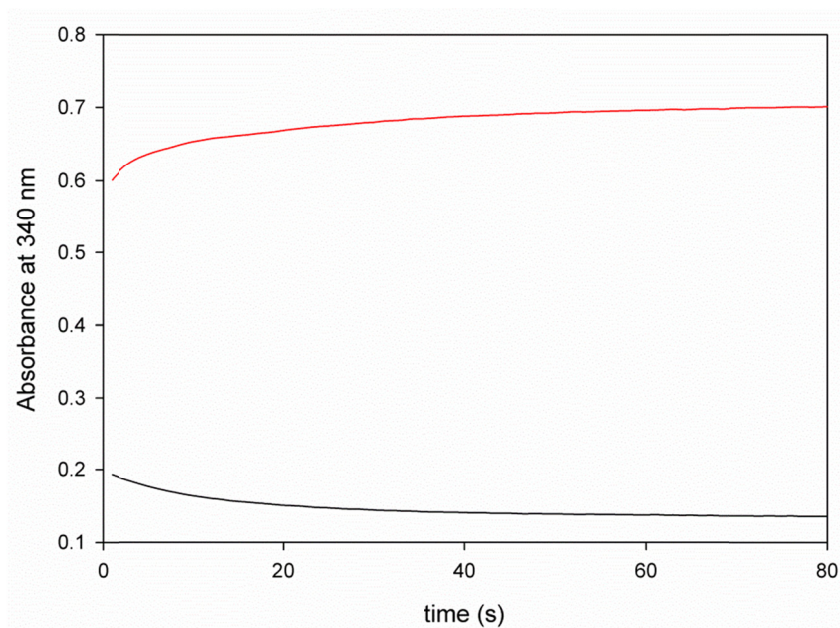



Figure S7: HPLC analysis of end-point reactions under single-turnover conditions in  $\text{H}_2\text{O}$  and  $\text{D}_2\text{O}$

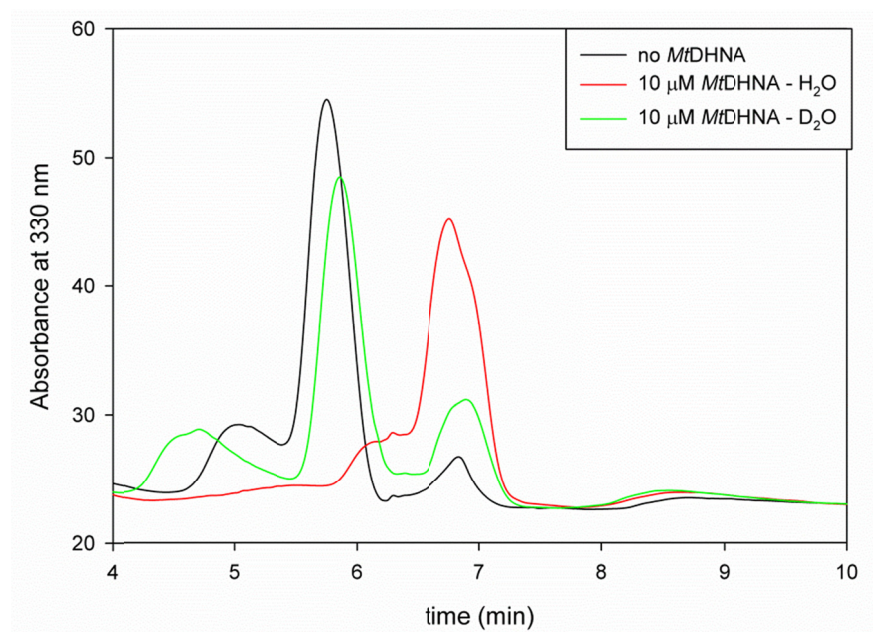

Retention time 4.5 min = DHNP

Retention time 5.5 min = DHMP

Retention time 6.8 min = HP

Retention time 8.3 min = DHXP

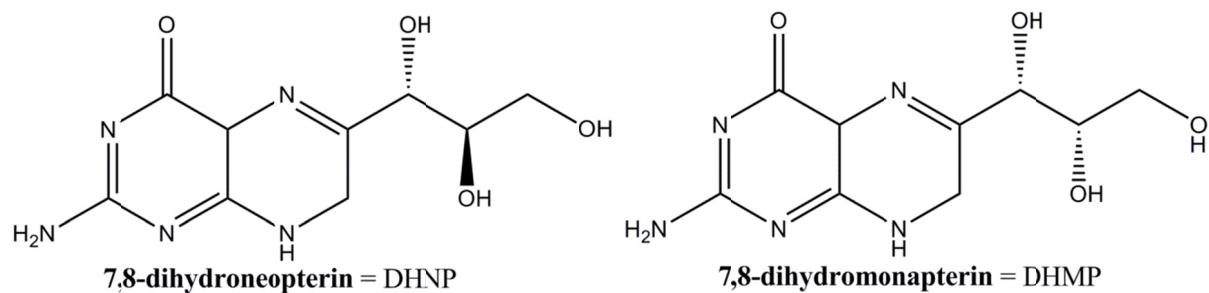

Positions of *Mt*DHNA residues are shown (Y54, K99, and E74)

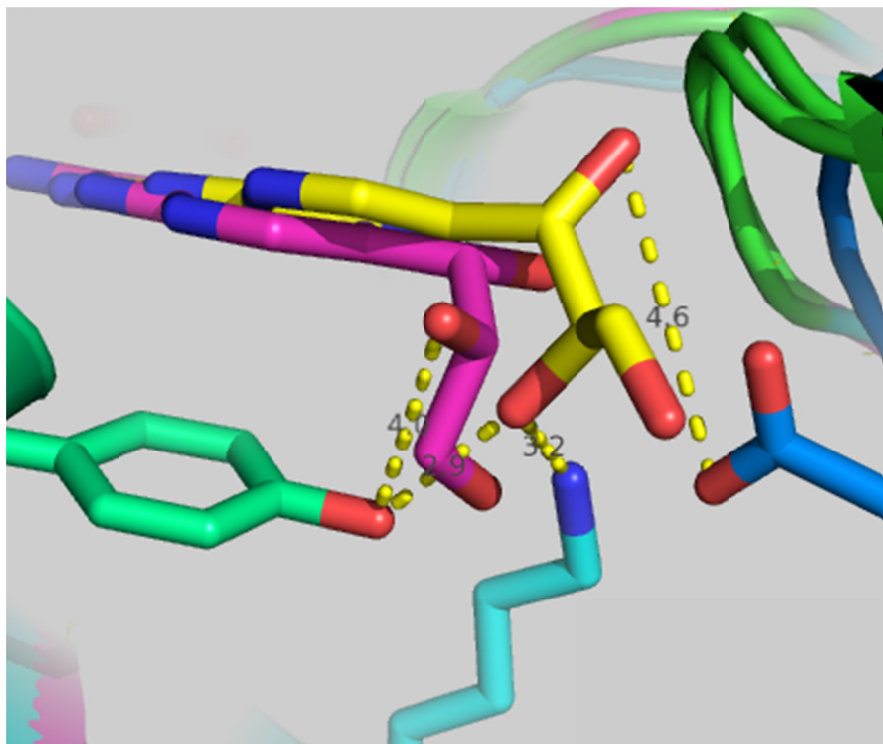

Figure S8: Comparison between SaDHNA active site with monapterin (magenta) or neopterin (yellow) bound<sup>1</sup>. K99 is shown in light blue, Y54 in green, and E74 in dark blue.

Figure S9: Reverse reaction single turnover

A)

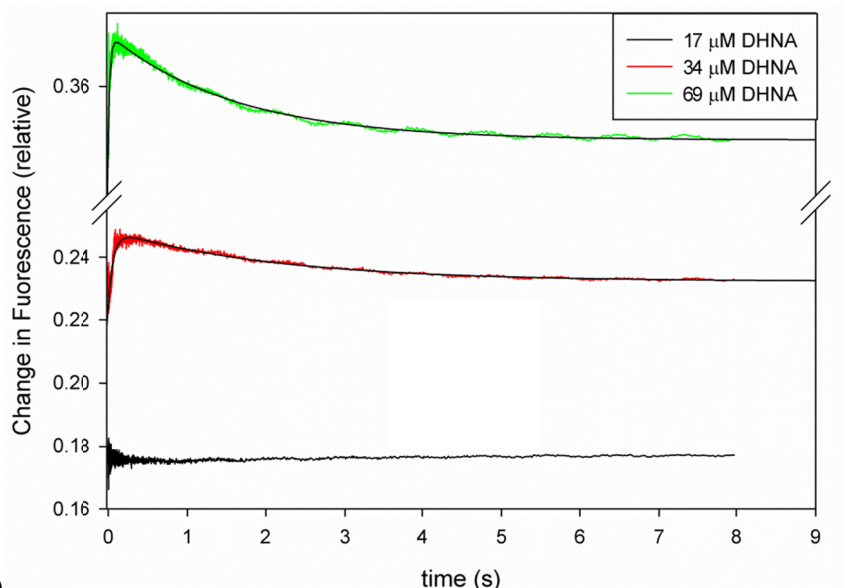

B)

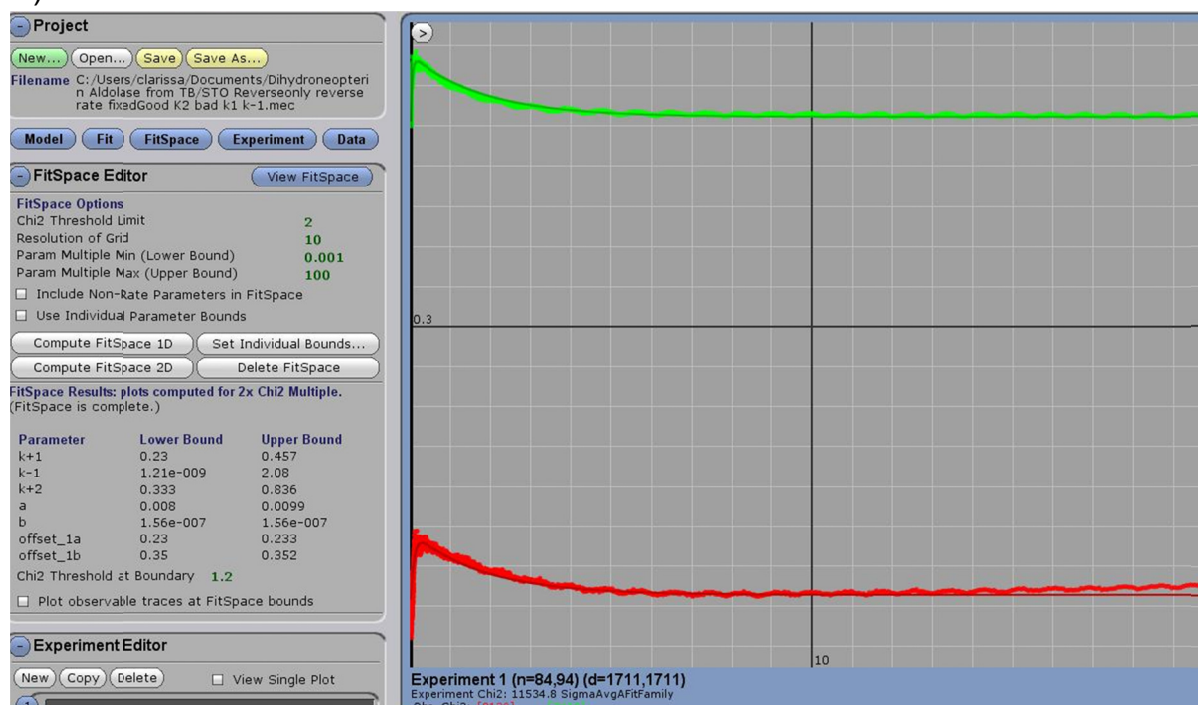

Single turnover experiments for the reverse reaction. 17, 34 or 69 μM *Mt*DHNA were mixed with 2 μM HP and 100 mM GA. Fluorescence signal was due to fluorescence of HP, so decrease in signal is expected as HP is consumed. A) Data were fitted to double exponential equations ( $k_{\text{obs}} = 0.3699$  at 34 μM *Mt*DHNA, and  $k_{\text{obs}} = 0.6333$  at 69 μM *Mt*DHNA). Data at 17 μM could not be fitted due to small amplitude of the second phase. B) Data fitting using Kintek Global Explorer, showing FitSpace results.

Figure S10: HPLC assays demonstrating that in the presence of *Mt*DHNA and HP, DHXP is the only product formed. Retention time 6.8 min = HP, and retention time 8.3 min = DHXP.

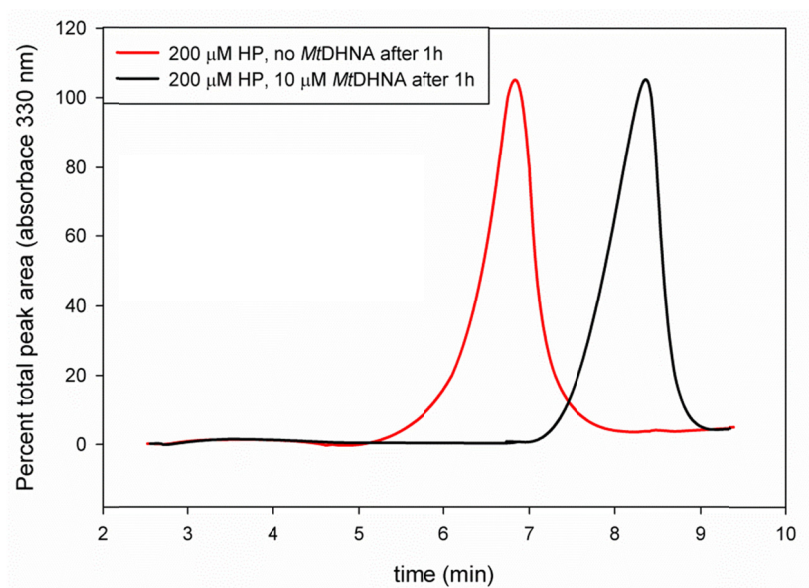

Table S1

## Measured rates

| Direction | Process          | Rate or rate constant ( $\text{s}^{-1}$ )                                                 | Method used to determine |
|-----------|------------------|-------------------------------------------------------------------------------------------|--------------------------|
| Forward   | DHNP consumption | $k_{\text{burst-DHNP}} = 0.0176 \pm 0.0063$<br>$k_{\text{cat-DHNP}} = 0.0112 \pm 0.008$   | Quench-flow              |
|           |                  | $k_{\text{cat-DHNP}} = 0.0146 \pm 0.0015 \text{ s}^{-1}$                                  | NMR                      |
| Forward   | HP formation     | $k_{\text{burst-HP}} = 0.037 \pm 0.031$<br>$k_{\text{cat-HP}} = 0.0091 \pm 0.0008$        | Quench-flow              |
|           | -using DHNP      | $0.028 \pm 0.001$                                                                         | Stopped-Flow (STO)       |
|           | -using DHMP      | $0.026 \pm 0.001$                                                                         | Stopped-Flow (STO)       |
|           |                  | $k_{\text{cat-HP}} = 0.0074 \pm 0.0005 \text{ s}^{-1}$                                    | NMR                      |
| Forward   | DHMP formation   | $k_{\text{burst-DHMP}} = 0.0098 \pm 0.0023$<br>$k_{\text{cat-DHMP}} = 0.00151 \pm 0.0006$ | Quench-flow              |
|           |                  | $k_{\text{cat-DHMP}} = 0.0015 \pm 0.0004$                                                 | NMR                      |
| Forward   | DHXP formation   | $k_{\text{burst-DHXP}} = 0.0652 \pm 0.0267$<br>$k_{\text{cat-DHXP}} = 0.00113 \pm 0.0002$ | Quench-flow              |
|           |                  | $k_{\text{cat-DHXP}} = 0.0023 \pm 0.0004$                                                 | NMR                      |
| Reverse   | HP consumption   | $0.0247 \pm 0.0012$                                                                       | NMR                      |
|           |                  | $0.52 \text{ s}^{-1}$ (estimated, see text)                                               | Stopped-Flow (STO)       |
|           | DHNP formation   | $= 0.0128 \pm 0.0004$                                                                     | NMR                      |
|           | DHMP formation   | $= 0.0031 \pm 0.0001$                                                                     | NMR                      |

\*STO = Single turnover conditions

Table S2: Models tested for dome-shaped proton inventory fit – Red letters indicate why the model was rejected

| <sup>D2O</sup> V                                                                             |                                                                                                     |                                                               |                                                                                   |                                   |                               |                      |
|----------------------------------------------------------------------------------------------|-----------------------------------------------------------------------------------------------------|---------------------------------------------------------------|-----------------------------------------------------------------------------------|-----------------------------------|-------------------------------|----------------------|
| Model                                                                                        | Equation                                                                                            | $\phi_1$                                                      | $\Phi_2$                                                                          | $\Phi_{\text{Solvent}}$           | $R^2$                         | SKIE <sub>calc</sub> |
| 1TS proton                                                                                   | $V_n = V_0*(1-n+n*\phi_1)$                                                                          | $0.76 \pm 0.06$                                               |                                                                                   |                                   | <b>0.51</b>                   | 1.3                  |
| 1 TS proton,<br>1 solvent<br>proton                                                          | $V_n = V_0*(1-n+n*\phi_1)*(\Phi_{\text{Solvent}})^n$                                                | $0.18 \pm 0.04$                                               |                                                                                   | $2.76 \pm 0.33$                   | 0.87                          | <b>2.01</b>          |
| 2 TS<br>protons $\phi_1 = \phi_2$                                                            | $V_n = V_0*(1-n+n*\phi_1)^2$                                                                        | $0.88 \pm 0.03$                                               |                                                                                   |                                   | <b>0.50</b>                   | 1.3                  |
| 2 TS<br>protons, $\phi_1 = \phi_2$ , solvent<br>contribution                                 | $V_n = V_0*(1-n+n*\phi_1)^2*(\Phi_{\text{Solvent}})^n$                                              | $2.61 \pm 0.21$                                               |                                                                                   | <b><math>0.09 \pm 0.02</math></b> | 0.90                          | 1.63                 |
| <b>2 TS<br/>protons <math>\phi_1 \neq \phi_2</math></b>                                      | <b><math>V_n = V_0*(1-n+n*\phi_1)*(1-n+n*\phi_2)</math></b>                                         | <b><math>1.88 \pm 0.09</math></b>                             | <b><math>0.33 \pm 0.03</math></b>                                                 |                                   | <b>0.84</b>                   | <b>1.6</b>           |
| 2 TS<br>protons, $\phi_1 \neq \phi_2$ , solvent<br>contribution                              | $V_n = V_0*(1-n+n*\phi_1)*(1-n+n*\phi_2)*(\Phi_{\text{Solvent}})^n$                                 | $0.49 \pm 0.27$                                               | $2.55 \pm 0.73$                                                                   | $0.52 \pm 0.40$                   | 0.71                          | 1.53                 |
| 2 distinct<br>TS, one TS<br>proton from<br>each                                              | $V_n = V_0*[(1-n+n*\phi_1) + (1-n+n*\phi_2)]$                                                       | <b><math>0.20 \pm 125415</math></b>                           | <b><math>0.0024 \pm 125415</math></b>                                             |                                   | 0                             |                      |
| 1 TS proton,<br>1 RS proton                                                                  | $V_n = V_0*[(1-n+n*\phi_1)/(1-n+n*\phi_2)]$                                                         | <b><math>0.02 \pm 0.06</math></b>                             | <b><math>0.08 \pm 0.08</math></b>                                                 |                                   | 0.80                          |                      |
| 2 TS<br>protons,<br>from each<br>TS,<br>weighting<br>factor<br>included<br>(w <sub>1</sub> ) | $V_n = V_0*[w_1*(1-n+n*\phi_{1a})*(1-n+n*\phi_{1b}) + (1-w_1)*(1-n+n*\phi_{2a})*(1-n+n*\phi_{2b})]$ | $\phi_{1a} = 1.04 \pm 0.001$<br>$\phi_{1b} = 0.98 \pm 0.0002$ | $\Phi_{2a} = 0.62 \pm 0.0002$<br><b><math>\Phi_{2b} = 0.97 \pm 6704600</math></b> |                                   | 0.93<br>w <sub>1</sub> = 0.93 | <b>1.0</b>           |

| $D_2O$ $V/K_{DHMP}$                                 |                                                             |                                   |                                   |             |             |
|-----------------------------------------------------|-------------------------------------------------------------|-----------------------------------|-----------------------------------|-------------|-------------|
| Model                                               | Equation                                                    | $\phi_1$                          | $\Phi_2$                          | $R^2$       |             |
| 1TS proton                                          | $V_n = V_0*(1-n+n*\phi_1)$                                  | $0.33 \pm 0.04$                   |                                   | 0.92        | 3.03        |
| <b>2 TS protons <math>\phi_1 \neq \phi_2</math></b> | <b><math>V_n = V_0*(1-n+n*\phi_1)*(1-n+n*\phi_2)</math></b> | <b><math>1.38 \pm 0.23</math></b> | <b><math>0.18 \pm 0.07</math></b> | <b>0.94</b> | <b>4.02</b> |

## References

- (1) Blaszczyk, J.; Li, Y.; Gan, J.; Yan, H.; Ji, X. *J Mol Biol* **2007**, 368, 161.
